# Supplementary material for: Probiotic supplementation does not improve eradication rate of Helicobacter pylori infection compared to placebo based on standard therapy: a meta-analysis
Source: PubMed Central journal article supplement (PMC4800733; doi:10.1038/srep23522), 2016-03-21

**Probiotic supplementation does not improve eradication rate of  
Helicobacter pylori infection compared to placebo based on standard  
therapy: a meta-analysis**

S1: Meta-analysis showed the distribution of diarrhea, nausea, vomiting, bloating, epigastric pain, constipation, headache and metallic taste in the probiotics group vs. non-placebo groups and estimated the OR with a 95% confidence interval and weight percentage.

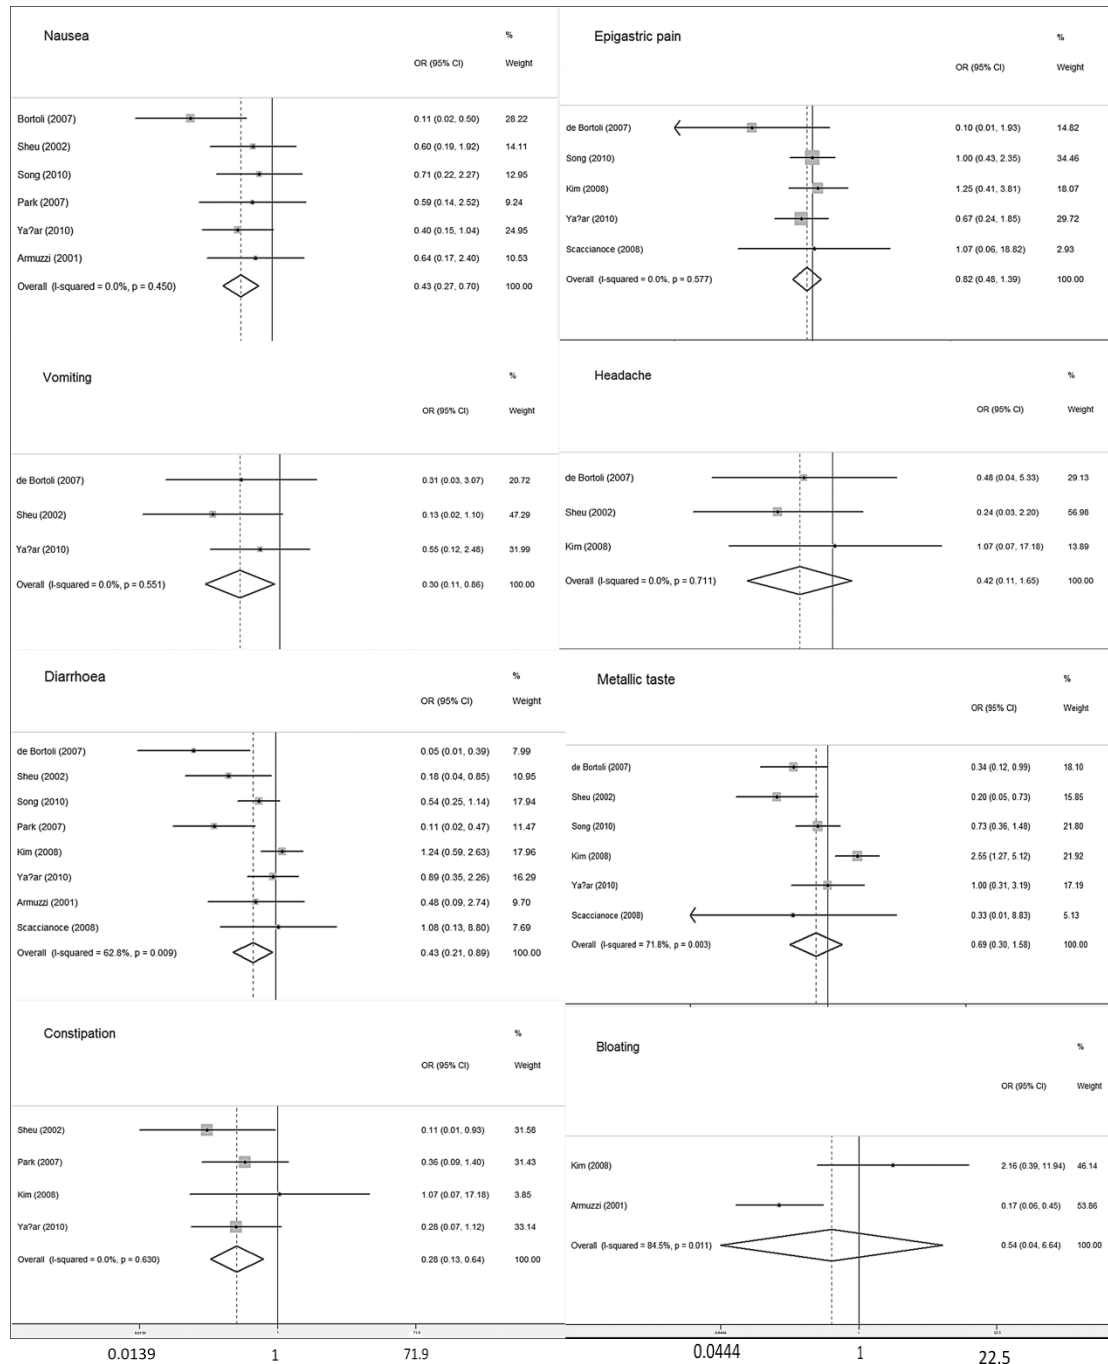

S2: Meta-analysis showed the distribution of diarrhea, nausea, vomiting, bloating, epigastric pain, constipation in the probiotics group vs. placebo groups and estimated the OR with a 95% confidence interval and weight percentage.

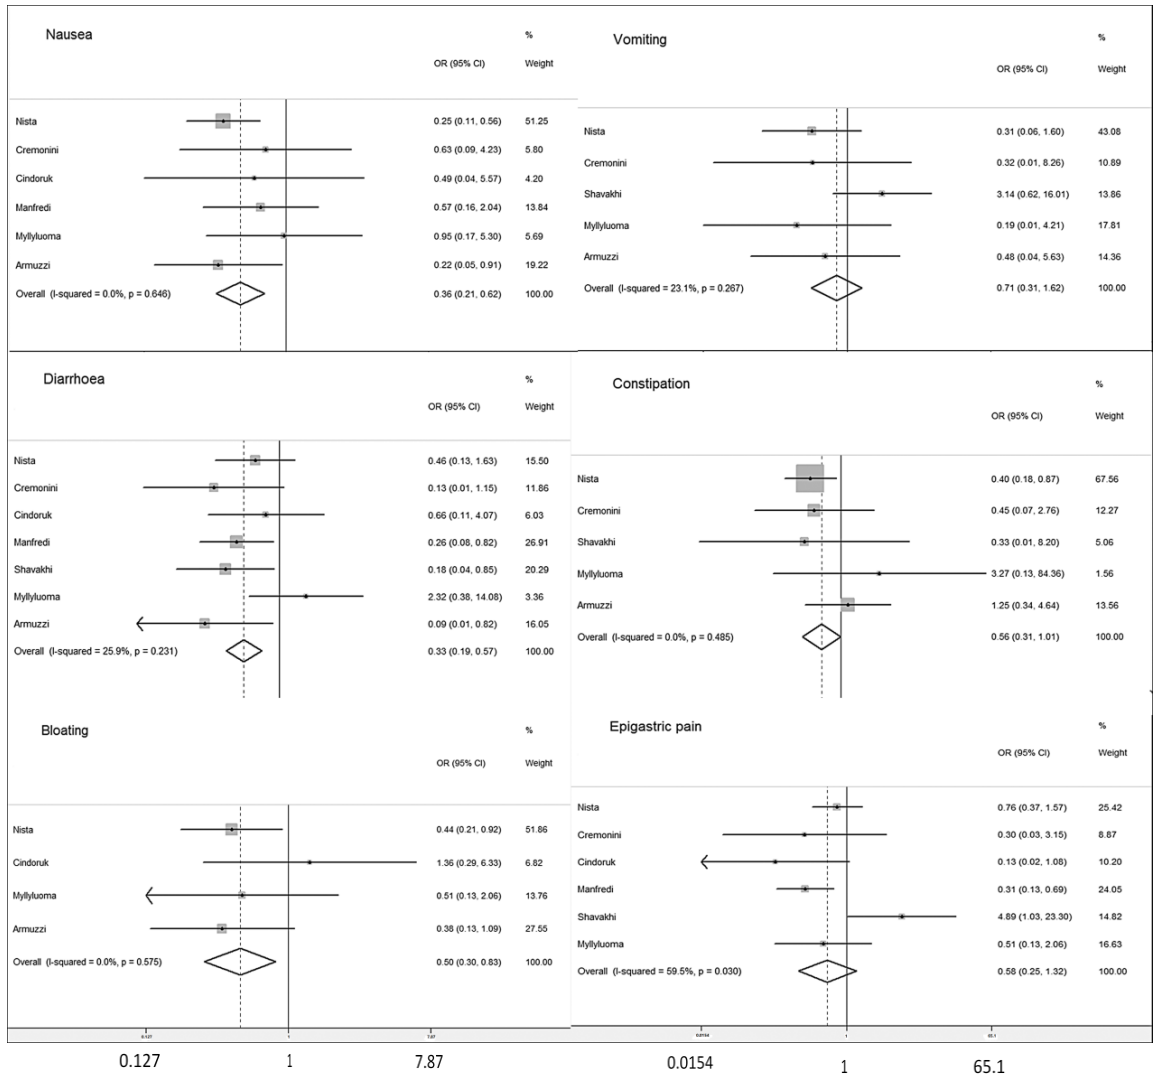

Supplement: srep23522-s1.pdf [file srep23522-s1.pdf]
